# Supplementary material for: Extreme isotopologue disequilibrium in molecular SIMS species during SHRIMP geochronology
Source: Copernicus journal article supplement (doi:10.5194/gi-6-523-2017), 2017-12-06
Supplement: Supplementary file 1 [file gi-6-523-2017-supplement.zip]

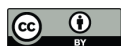

*Supplement of*

## **Extreme isotopologue disequilibrium in molecular SIMS species during SHRIMP geochronology**

**C. W. Magee Jr. et al.**

*Correspondence to:* Charles W. Magee Jr. ([cwmagee@gmail.com](mailto:cwmagee@gmail.com))

- [gi-6-523-2017-supplement-title-page.pdf](#)
- [Magee-isotopologuedeviation-Tables.xls](#)

The copyright of individual parts of the supplement might differ from the CC BY 3.0 License.
